# Supplementary material for: Integrating Co(OH)2 nanosheet arrays on graphene for efficient noble-metal-free EY-sensitized photocatalytic H2 evolution
Source: Royal Society of Chemistry journal article supplement (doi:10.1039/d3dt02513f), 2023-01-01
Supplement: d3dt02513f1.pdf [file d3dt02513f1.pdf]

*Supporting Information for the manuscript*

**Integrating Co(OH)<sub>2</sub> nanosheet arrays on  
graphene for efficient noble-metal-free EY-  
sensitized photocatalytic H<sub>2</sub> evolution**

Yu Wei<sup>‡</sup>, Jin-Ge Hao<sup>‡</sup>, Jia-Lin Zhang, Wei-Ya Huang, Shao-bo Ouyang, Kai Yang\*  
and Kang-Qiang Lu\*

Jiangxi Provincial Key Laboratory of Functional Molecular Materials Chemistry,  
College of Materials, Metallurgical and Chemistry,, Jiangxi University of Science and  
Technology, Ganzhou, 341000, PR China

\*To whom correspondence should be addressed

E-mail: kqlu@jxust.edu.cn\_yangkai@jxust.edu.cn

Yu Wei and Jin-Ge Hao contributed equally to this work

## Synthetic procedures and characterization of products

### 1. Preparation of graphene oxide

Synthesis of graphene oxide: GO was synthesized by a modified Hummers' method. In detail, 10 g graphite powder (provided from Qingdao Zhong tian Company, China) was put into 230 mL concentrated H<sub>2</sub>SO<sub>4</sub> under moderate stirring. Then, 30 g KMnO<sub>4</sub> was added gradually under stirring and the solution was cold below 5 °C in an ice bath. After that, the solution was heated to 35 °C in a water-bath and kept stirring for 2 h. Then, the mixture was diluted with 500 mL DI water in an ice bath to keep the temperature below 5 °C. Shortly after the further diluted with 1.5 L of DI water, 80 mL 30% H<sub>2</sub>O<sub>2</sub> was then added into the mixture. The mixture was centrifuged and washed with 1:10 HCl aqueous solution to remove metal ions followed by DI water to remove the acid. After that, the mixture was dialyzed for one week and the final GO sample was obtained after full sonication.

### 2. Characterizations

The morphological characteristics were tested through scanning electron microscopy SEM (ZEISS Sigma 500 instrument) and transmission electron microscopy TEM (Jeol JEM-2100F instrument). The determination of crystal structures was determined by X-ray diffraction (XRD) with Cu K $\alpha$  ( $\lambda = 0.15406$  nm, Bruker D8). The surface composition of the samples was determined by X-ray photoelectron spectrometer (XPS, Thermo Fisher K-Alpha). The nitrogen adsorption-desorption isotherm of samples was analyzed using ASAP 2020 automatic analyzer. Raman spectra were recorded on a Renishaw in Via Raman System 1000 with a 532 nm Nd:YAG excitation source. The photoluminescence of the samples was analyzed by using FLS980 fluorescence spectrometer at the excitation wavelength  $\lambda=490$  nm. The above PL measurements were performed in H<sub>2</sub>O/TEOA (5:1, 6mL) mixed solution containing 15 mg EY and 1 mg as-prepared cocatalysts. Contact angle measurements were carried out using the static drop method using a Fangrui Instrument Company JCY contact angle meter. Likewise, gas-solid phosphating was performed on the samples using a tube furnace (OTF-1200X). Furthermore, all the electrochemical measurements of the photocurrent, the electrochemical impedance spectra (EIS), the Mott–Schottky (MS), cyclic voltammetry (CV) and linear sweep voltammetry (LSV) curves were carried out in the three-electrode cell, in which Ag/AgCl was used as reference electrode, a Pt wire was used as a counter electrode and an indium in oxide (ITO) conductive glass was used with the samples as a working electrode in 0.1 M Na<sub>2</sub>SO<sub>4</sub> electrolyte (pH=7.56), all measurements were carried out on CH Instruments CHI-660E electrochemical workstation. The values relative to Ag/AgCl could be directly converted to the values vs NHE to facilitate comparison.

$$E_{\text{NHE}} = E_{\text{Ag/AgCl}} + 0.059 \times \text{pH} + E_{\text{Ag/AgCl}}^0$$

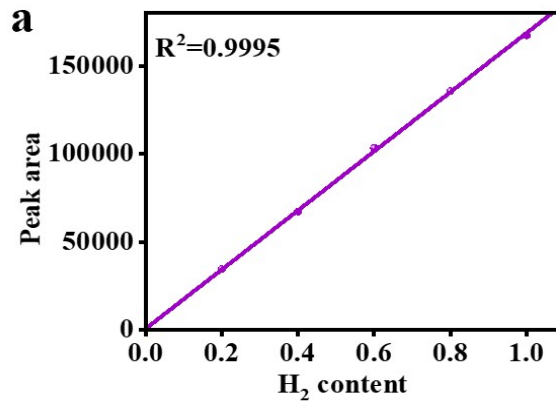

**Fig. S1** Gas chromatography curves for H<sub>2</sub> standard under different contents.

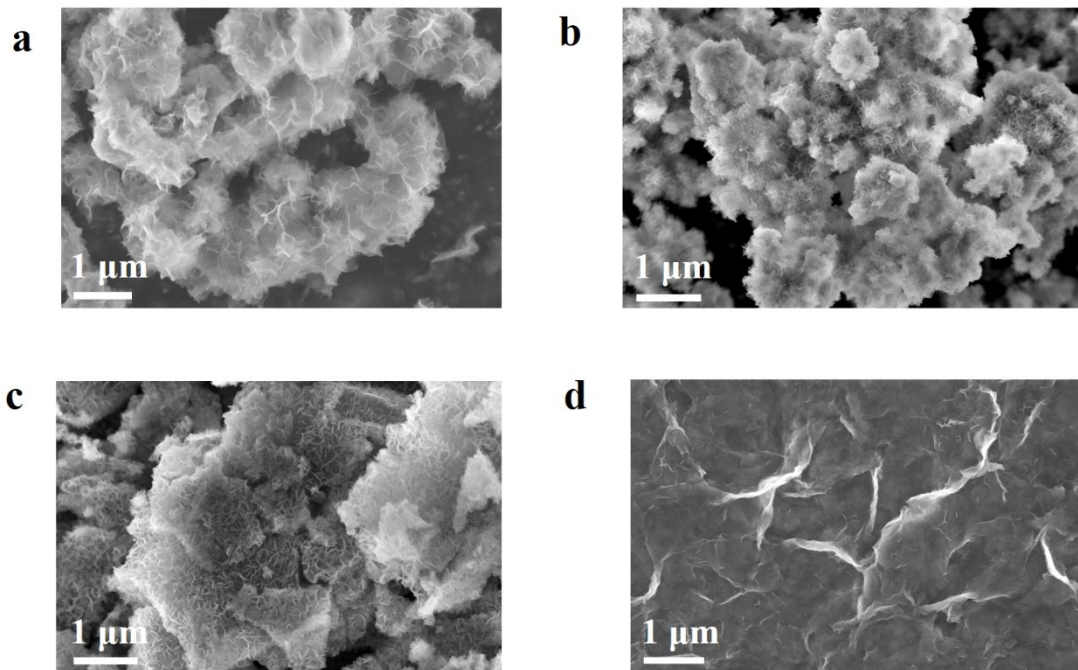

**Fig. S2** Morphology information of Co(OH)<sub>2</sub>-GR FESEM images of (a) Co(OH)<sub>2</sub>, (b) Co(OH)<sub>2</sub>-1%GR, (c) Co(OH)<sub>2</sub>-5%GR and (d) Co(OH)<sub>2</sub>-30%GR.

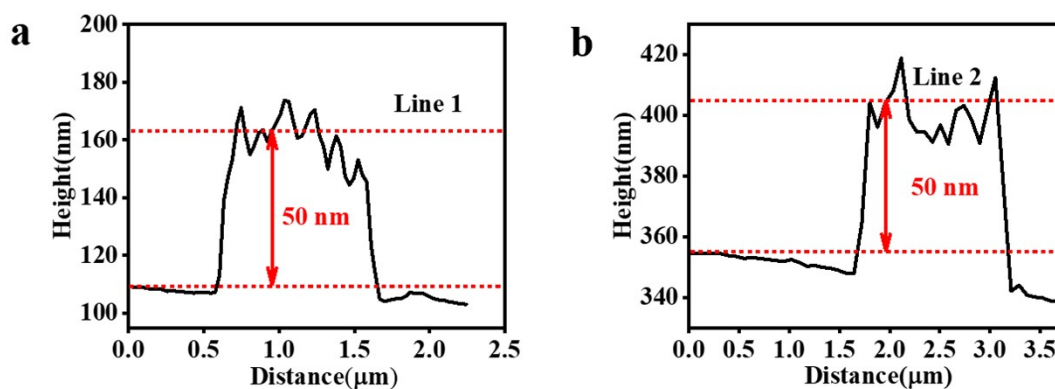

**Fig. S3** Thickness information of  $\text{Co}(\text{OH})_2$  -10%GR The corresponding height profiles along the (a) white line 1 and (b) white line 2 drawn in **Fig. 1g**.

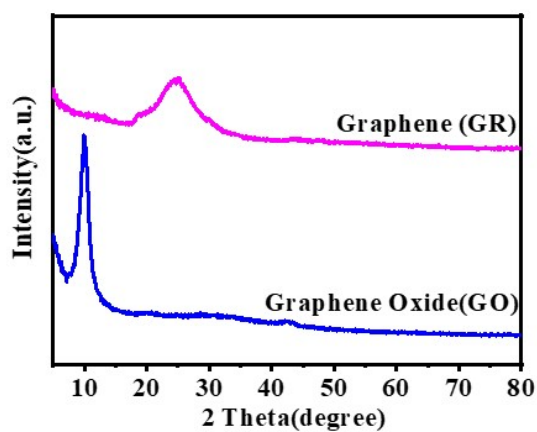

**Fig. S4** XRD patterns of graphene oxide (GO) and graphene (GR).

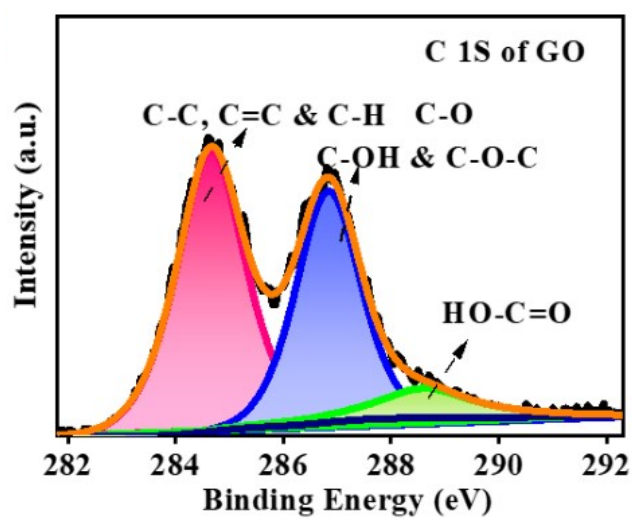

Fig. S5 High-resolution C 1s XPS spectrum of GO.

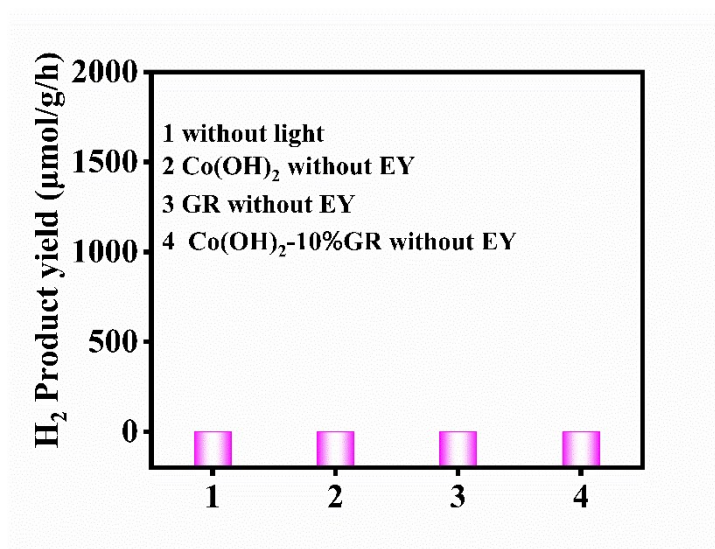

Fig. S6 Control experiments for photocatalytic measurements.

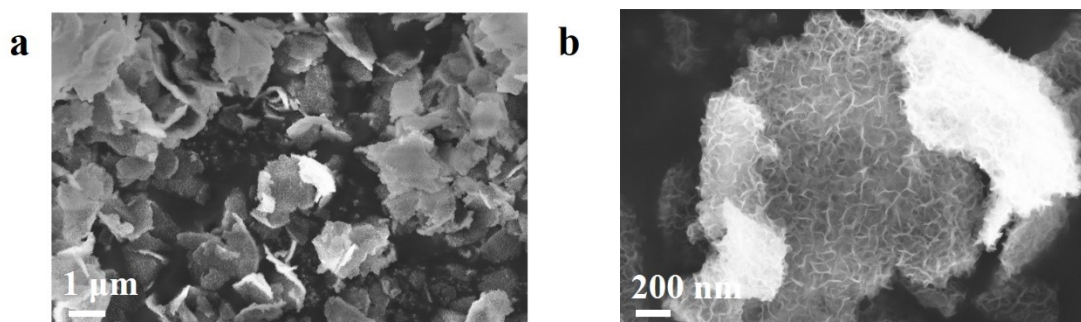

Fig. S7 SEM images of used Co(OH)<sub>2</sub>-10%GR composite.

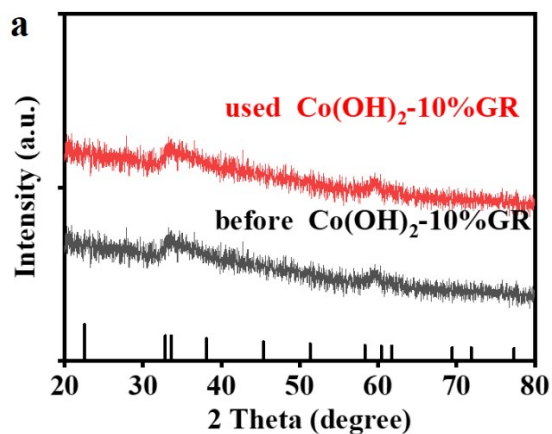

Fig. S8 XRD patterns of used  $\text{Co(OH)}_2$ -10%GR composite.

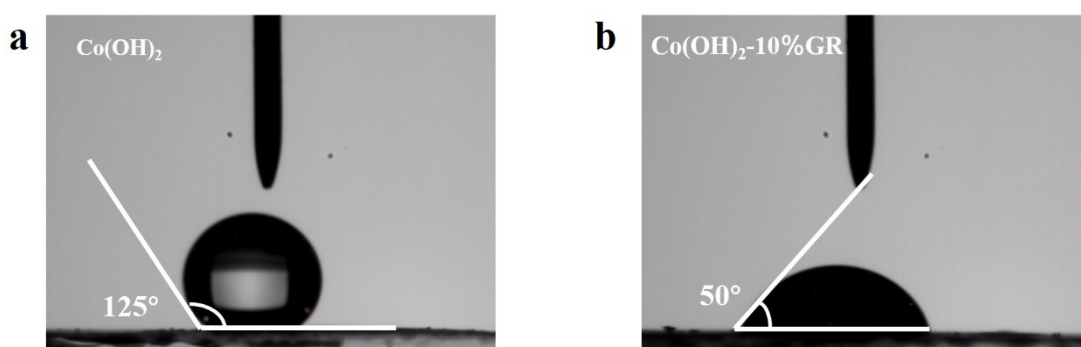

Fig. S9 Contact angle tests of (a) pure  $\text{Co(OH)}_2$ , (b)  $\text{Co(OH)}_2$ -10%GR composites.

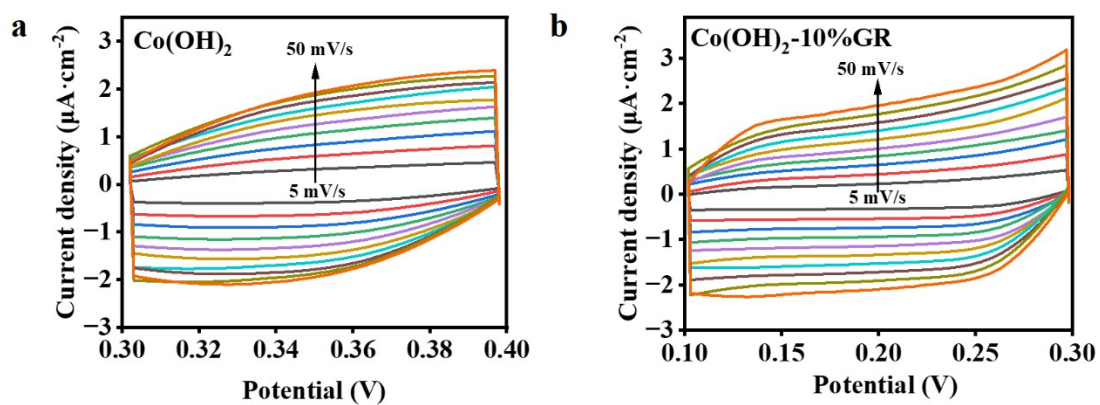

Fig. S10 The CV curves of (a) pure  $\text{Co(OH)}_2$  and (b)  $\text{Co(OH)}_2$ -10%GR.

**Table S1.** Comparison of this work and other photocatalysts for photocatalytic hydrogen evolution.

| Photocatalysts                                       | photosensitizer | Light sources                     | Sacrificial agents | H <sub>2</sub> ( $\mu\text{mol}\cdot\text{g}^{-1}\cdot\text{h}^{-1}$ ) | Ref       |
|------------------------------------------------------|-----------------|-----------------------------------|--------------------|------------------------------------------------------------------------|-----------|
| Co(OH) <sub>2</sub> -GR                              | EY              | 300 W Xe lamp; $\lambda > 420$ nm | TEOA               | 17539                                                                  | this work |
| UiO-66-NH <sub>2</sub>                               | EY              | 300 W Xe lamp; $\lambda > 380$ nm | TEOA               | 2760                                                                   | 1         |
| MoS <sub>2</sub>                                     | EY              | 300 W Xe lamp; $\lambda > 400$ nm | TEOA               | 18                                                                     | 2         |
| Co(OH) <sub>2</sub> /CdS                             | EY              | 300 W Xe lamp; $\lambda > 420$ nm | TEOA               | 14430                                                                  | 3         |
| RGO/NiS <sub>x</sub>                                 | EY              | 300 W Xe lamp; $\lambda > 420$ nm | TEOA               | 109.9                                                                  | 4         |
| Co(OH) <sub>2</sub> /g-C <sub>3</sub> N <sub>4</sub> | EY              | 300 W Xe lamp; $\lambda > 400$ nm | TEOA               | 431.9                                                                  | 5         |
| Sb/SnO <sub>2</sub>                                  | EY              | 300 W Xe lamp; $\lambda > 420$ nm | TEOA               | 49.94                                                                  | 6         |
| Zn <sub>0.3</sub> Co <sub>2.7</sub> S <sub>4</sub>   | EY              | 300 W Xe lamp; $\lambda > 400$ nm | TEOA               | 155.2                                                                  | 7         |
| Co(OH) <sub>2</sub> /TiO <sub>2</sub>                | EY              | 300 W Xe lamp; $\lambda > 420$ nm | TEOA               | 746.93                                                                 | 8         |
| Co <sub>2</sub> (OH) <sub>3</sub> Cl/GO              | EY              | 300 W Xe lamp; $\lambda > 420$ nm | TEOA               | 97.4                                                                   | 9         |
| ZnO/SrTiO <sub>3</sub>                               | EY              | 300 W Xe lamp; $\lambda > 420$ nm | TEOA               | 16006.12                                                               | 10        |
| ZnO/BiOCl                                            | EY              | 300 W Xe lamp; $\lambda > 420$ nm | TEOA               | 4146.77                                                                | 11        |
| 2DCo-MOF/p-g-C <sub>3</sub> N <sub>4</sub> /         | EY              | 300 W Xe lamp; $\lambda > 420$ nm | TEOA               | 73.42                                                                  | 12        |
| 5% Sm doped                                          |                 |                                   |                    |                                                                        |           |

**Table S2.** Surface areas of samples.

| Samples                    | BET surface area ( $\text{m}^2 \cdot \text{g}^{-1}$ ) |
|----------------------------|-------------------------------------------------------|
| Co(OH) <sub>2</sub>        | 35.85                                                 |
| Co(OH) <sub>2</sub> -10%GR | 76.34                                                 |

## References

1. J. W. Shi, F. Chen, L. L. Hou, G. S. Li, Y. Q. Li, X. J. Guan, H. P. Liu and L. J. Guo, *Appl. Catal., B*, 2021, **280**, 119385.
2. S. S. Chou, N. Sai, P. Lu, E. N. Coker, S. Liu, K. Artyushkova, T. S. Luk, B. Kaehr and C. J. Brinker, *Nat. Commun.*, 2015, **6**, 8311.
3. X. Zhou, J. Jin, X. J. Zhu, J. Huang, J. G. Yu, W.-Y. Wong and W.-K. Wong, *J. Mater. Chem. A*, 2016, **4**, 5282-5287.
4. C. Kong, S. X. Min and G. X. Lu, *ACS Catal*, 2014, **4**, 2763-2769.
5. Z. Li, Y. Q. Wu and G. X. Lu, *Appl. Catal., B*, 2016, **188**, 56-64.
6. L. Q. Yang, J. F. Huang, L. Shi, L. Y. Cao, W. Zhou, K. Chang, X. G. Meng, G. G. Liu, Y. N. Jie and J. H. Ye, *Nano Energy*, 2017, **36**, 331-340.
7. Z.-F. Huang, J. J. Song, K. Li, M. Tahir, Y. T. Wang, L. Pan, L. Wang, X. W. Zhang and J. J. Zou, *J. Am. Chem. Soc.*, 2016, **138**, 1359-1365.
8. H. Xu, S. S. Li, L. Ge, C. C. Han, Y. Q. Gao and D. S. Dai, *Int. J. Hydrogen. Energy.*, 2017, **42**, 22877-22886.
9. W. Y. Zhang, Y. L. Zou, X. Mei, Y. X. Li, S. Q. Peng and J. Y. Xu, *Sustain. Energ. Fuels*, 2020, **4**, 6181-6187.
10. Y. Zhao, Y. Guo, J. Li and P. Li, *I Int. J. Hydrogen. Energy.*, 2021, **46**, 18922-18935.
11. Y. Guo, C. Qi, B. Lu and P. Li, *Int. J. Hydrogen. Energy.*, 2022, **47**, 228-241.
12. S. Zhao, J. Xu, M. Mao, L. Li and X. Li, *J Colloid Interface Sci*, 2021, **583**, 435-447.
